# Supplementary material for: Mucus barrier-triggered disassembly of siRNA nanocarriers
Source: Royal Society of Chemistry journal article supplement (doi:10.1039/c4nr01584c), 2014-01-01
Supplement: c4nr01584c1.pdf [file c4nr01584c1.pdf]

## Electronic Supplementary Information

### Mucus barrier-triggered disassembly of siRNA nanocarriers

Troels B. Thomsen<sup>a,b</sup>, Leon Li<sup>c,d,e</sup>, Kenneth A. Howard<sup>\*a,b</sup>

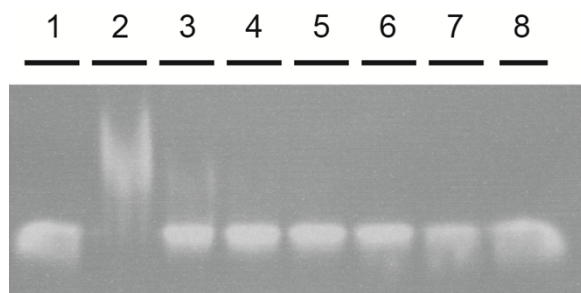

**Fig. S1** Evaluation of chitosan/siRNA-FAM nanocarrier stability using native polyacrylamide gel electrophoresis (PAGE). Displaced siRNA-FAM was resolved by gel electrophoresis after incubation with different heparin/siRNA-FAM (w/w) ratios for 30 min. Lane 1: Naked siRNA-FAM; Lane 2: Nanocarrier NP 60; Lane 3: Nanocarrier NP 60 + 2.5x heparin; Lane 4: Nanocarrier + 5x heparin; Lane 5: Nanocarrier + 10x heparin; Lane 6: Nanocarrier + 25x heparin; Lane 7: Nanocarrier + 50x heparin; Lane 8: Naked siRNA-FAM + 50x heparin.

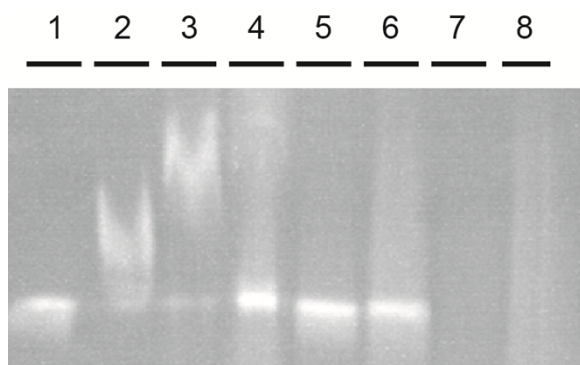

**Fig. S2** Evaluation of chitosan/siRNA-FAM nanocarrier stability in porcine gastric mucins (PGM) using native polyacrylamide gel electrophoresis (PAGE). Released siRNA-FAM was resolved by gel electrophoresis after incubation with different mucins (w/v) for 30 min. Lane 1: Naked siRNA-FAM; Lane 2: Nanocarrier NP 60; Lane 3: Nanocarrier NP 60 + 0.5% w/v PGM; Lane 4: Nanocarrier + 2% w/v PGM; Lane 5: Naked siRNA-FAM + 0.5% w/v PGM; Lane 6: Naked siRNA-FAM + 2% w/v PGM; Lane 7: 0.5% w/v PGM; Lane 8: 2% w/v PGM.
